# Supplementary material for: Infection of microglia with Porphyromonas gingivalis promotes cell migration and an inflammatory response through the gingipain-mediated activation of protease-activated receptor-2 in mice
Source: PubMed Central journal article supplement (PMC5603557; doi:10.1038/s41598-017-12173-1), 2017-09-18
Supplement: 41598_2017_12173_MOESM1_ESM.pdf [file 41598_2017_12173_MOESM1_ESM.pdf]

Supplementary Information for

**Infection of microglia with *Porphyromonas gingivalis* promotes cell migration and an inflammatory response through the gingipain-mediated activation of protease-activated receptor-2 in mice**

Yicong Liu<sup>1</sup>, Zhou Wu<sup>1,2</sup>, Yurika Nakanishi<sup>1</sup>, Junjun Ni<sup>1</sup>, Yoshinori Hayashi<sup>1</sup>, Fumiko Takayama<sup>1</sup>,  
Yamin Zhou<sup>3</sup>, Tomoko Kadowaki<sup>4</sup>, Hiroshi Nakanishi<sup>1,\*</sup>

<sup>1</sup>Department of Aging Science and Pharmacology, <sup>2</sup>OBT Research Center, Faculty of Dental Sciences, Kyushu University, Fukuoka 812-8582, Japan. <sup>3</sup>Department of Implantology, School of Stomatology, Jilin University, Changchun 130021, China. <sup>4</sup>Division of Frontier Life Science, Department of Medical and Dental Sciences, Graduate School of Biomedical Sciences, Nagasaki University, Nagasaki 852-8588, Japan

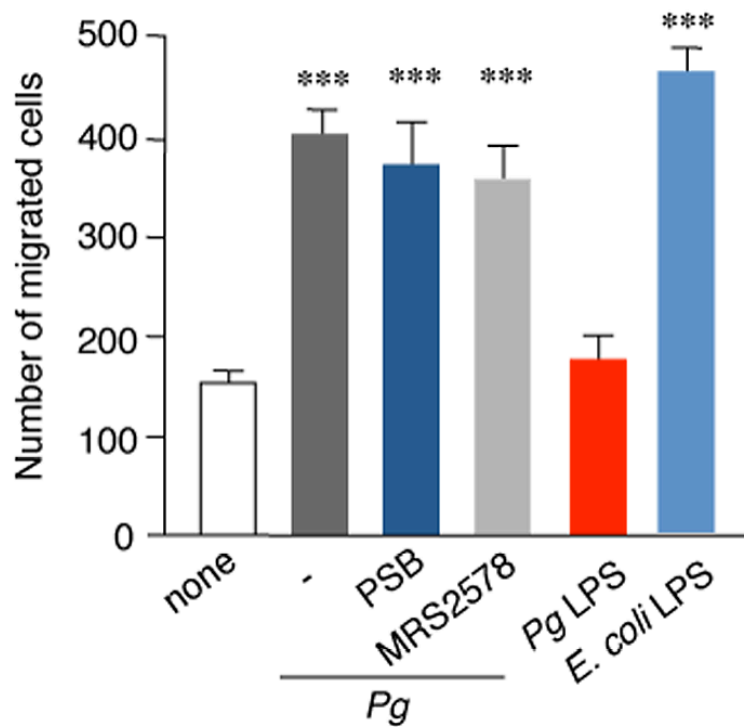

**Supplementary Figure S1. Microglial migration induced by infection with *P. gingivalis* in the absence or presence of PSB or MRS2578 and treatment with LPS derived from *P. gingivalis* or *E. coli*.** The quantitative analyses of the number of cells that migrated after the infection of MG6 cells with *P. gingivalis* in the absence or presence of PSB (1  $\mu$ M) or MRS2578 (1  $\mu$ M) and treatment with LPS (1  $\mu$ g/ml) or *E. coli* LPS (100 ng/ml). MG6 cells that migrated through a membrane were stained and counted after 12 h. The columns and bars represent the mean  $\pm$  SEM ( $n=3$ ). A one-way ANOVA with post hoc Tukey's test; none vs. *Pg*: \*\*\* $p=0.0001$ , *Pg* vs. *Pg*+PSB:  $p=0.9821$ , *Pg* vs. *Pg*+MRS2578:  $p=0.9629$ , none vs. *Pg* LPS:  $p=0.5006$ , none vs. *E. coli* LPS: \*\*\* $p=0.0001$ .

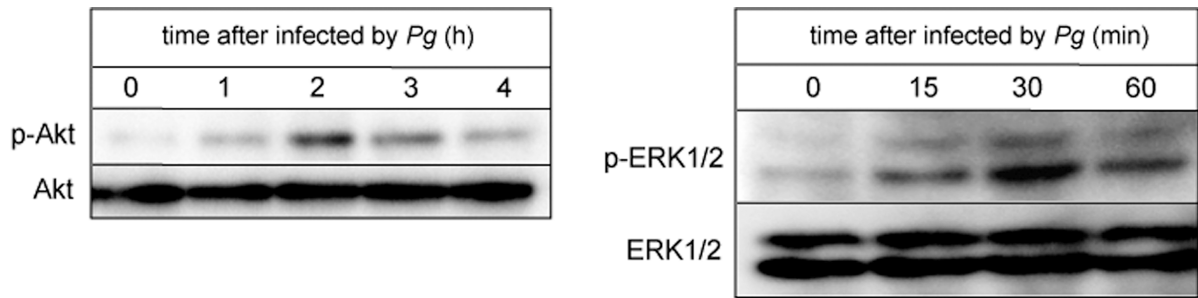

**Supplementary Figure S2. PAR2 activation and subsequent phosphorylation of Akt and ERK1/2 after infection of microglia with *P. gingivalis*.** The immunoblots show phosphorylation of Akt and ERK1/2 after infection of MG6 cells ( $2 \times 10^6$  cell/well, 6 -well plates) with *P. gingivalis* (MOI 1:5) at each time point.

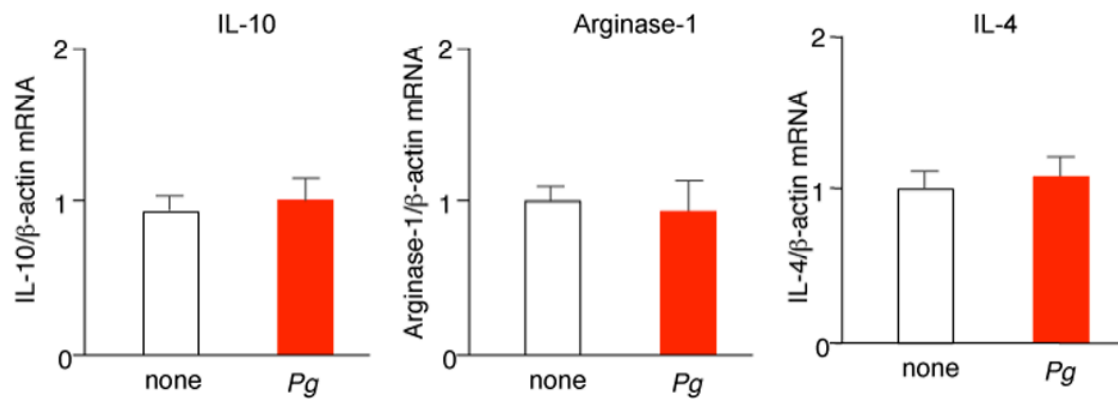

**Supplementary Figure S3. Effects of *P. gingivalis* infection on the expression of anti-inflammatory mediators in microglia.** The quantitative analyses of the mRNA expression of IL-10, Arginase-1 and IL-4 after the infection of MG6 cells ( $2 \times 10^6$  cell/well, 6 well plate) with *P. gingivalis* (MOI 1:5) at 12h. The columns and bars represent the mean $\pm$ SEM ( $n=3$ ). A two-tailed unpaired *t*-test; IL-10 group:  $p=0.4894$ . Arginase-1 group:  $p=0.569$ . IL-4 group:  $p=0.6172$ .

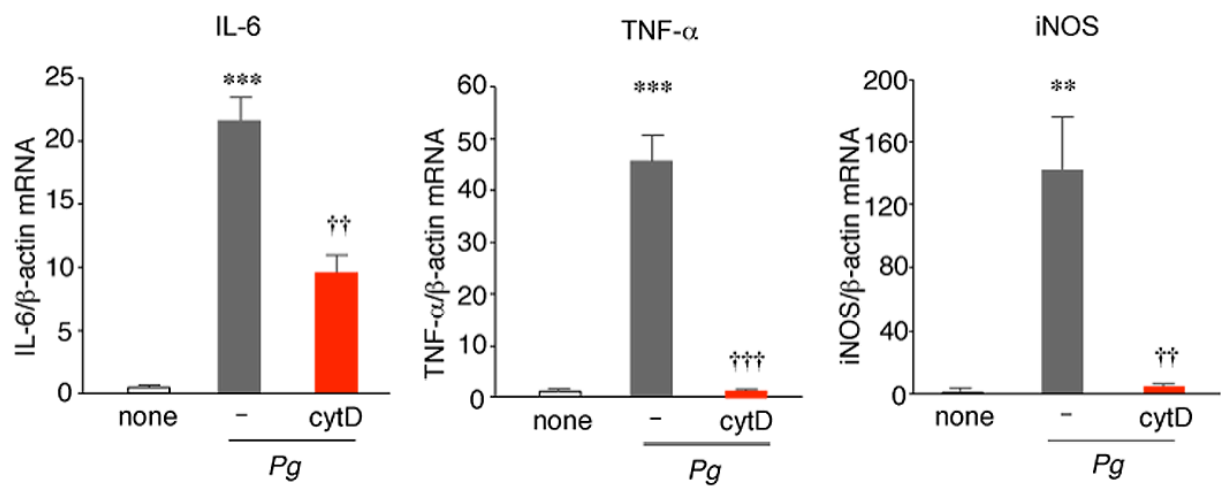

**Supplementary Figure S4. A possible link between cell migration and inflammatory responses of microglia in response to *P. gingivalis* infection.** The quantitative analyses of the mRNA expression of IL-6 , TNF-  $\alpha$  and iNOS after the infection of MG6 cells ( $2 \times 10^6$  cell/well, 6-well plates) with *P. gingivalis* (MOI 1:5) in the presence and absence of cytochalasin D (cytD, 1  $\mu$ M) at 12 h. The columns and bars represent the mean $\pm$ SEM ( $n=3$ ). A one-way ANOVA with post hoc Tukey's test; none vs. *Pg*, *Pg* vs. *Pg*+cytD were as follows: IL-6 group: \*\*\* $p=0.0003$ , †† $p=0.0042$ . TNF-  $\alpha$  group: \*\*\* $p=0.0001$ , ††† $p=0.0001$ , iNOS group: \*\* $p=0.0047$ , †† $p=0.0047$

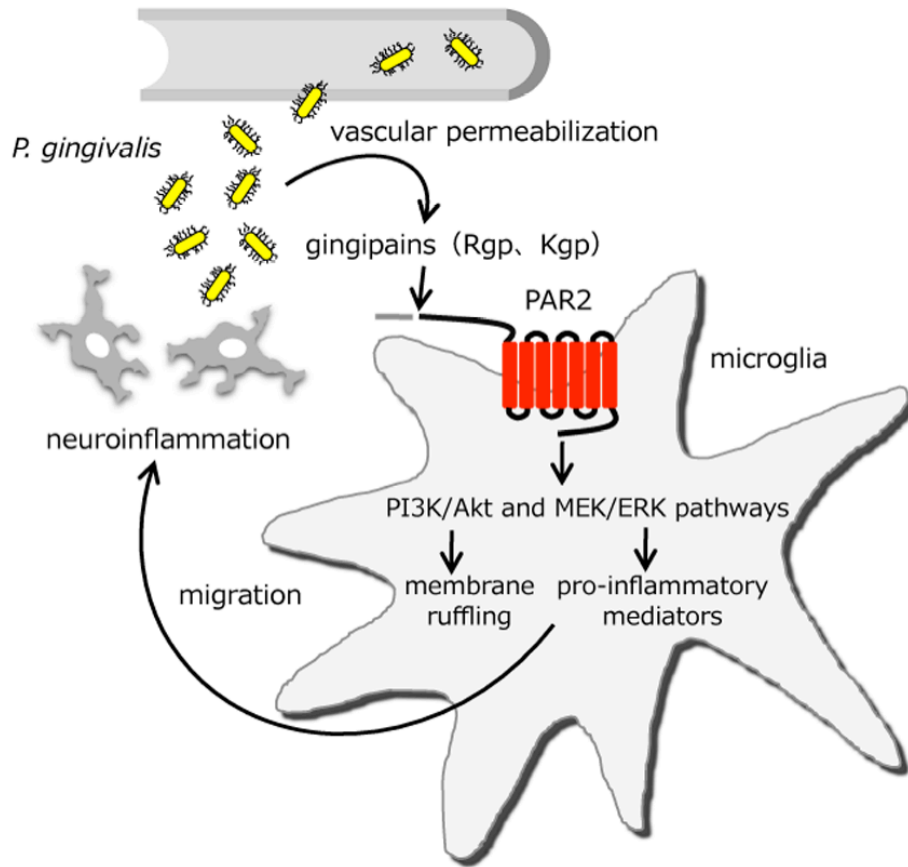

**Supplementary Figure S5. A schematic diagram of cellular activation of microglia after infection of *P. gingivalis*.** Gingipains (Rgp and Kgp) secreted from infected *P. gingivalis* activates PI3K/Akt and MEK/ERK pathways through proteolytic activation of PAR2, leading to induce migratory and inflammatory responses of microglia.

For Figure 4c

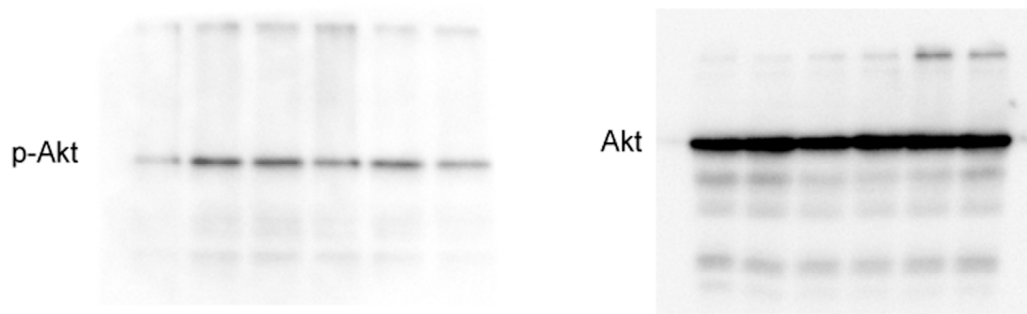

For Figure 4e

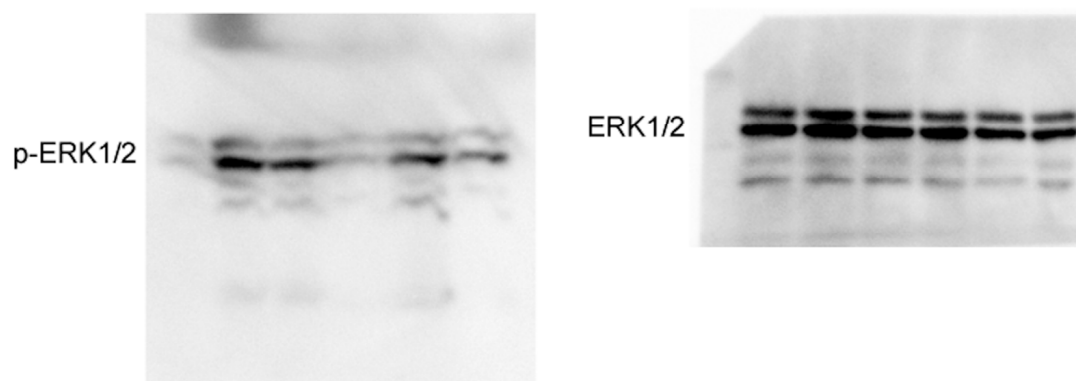

**Supplementary Figure S6.** Full-length blots used for Figure 4.
